1 **Histological and haematological analysis of the ascidian**  
2 ***Botrylloides leachii* (Savigny, 1816) during whole-body**  
3 **regeneration**

4

5 Simon Blanchoud<sup>1,2</sup> (simon.blanchoud@otago.ac.nz), Lisa Zondag<sup>1</sup> (lisa.zondag@otago.ac.nz),  
6 Miles D. Lamare<sup>3</sup> (miles.lamare@otago.ac.nz) and Megan J. Wilson<sup>1\*</sup>  
7 (meganj.wilson@otago.ac.nz)

8

9 <sup>1</sup>Department of Anatomy, Otago School of Medical Sciences; <sup>3</sup>Department of Marine Science,  
10 Division of Sciences; <sup>1,3</sup>University of Otago, P.O. Box 56, Dunedin 9054, New Zealand. <sup>2</sup> Present  
11 address: Department of Biology, University of Fribourg, Chemin du Musée 10, 1700 Fribourg,  
12 Switzerland.

13

14 \*corresponding author: Ph. +64 3 4704695, Fax: +64 479 7254

15

16 **Running title:** *Botrylloides leachii* whole-body regeneration

17

18 **Article type:** Original paper

19

20

21

22 **Abstract** (250 words)

23 Whole-body regeneration, the formation of an entire adult from only a small fragment  
24 of its own tissue, is extremely rare among chordates. Exceptionally, in the colonial ascidian  
25 *Botrylloides leachii*, a fully functional adult is formed from their common vascular system,  
26 upon ablation of all adults from the colony, in just 10 days thanks to their high blastogenetic  
27 potential. While previous studies have identified key genetic markers and morphological  
28 changes, no study has yet focused on the haematological aspects of regeneration despite the  
29 major involvement of the remaining vascular system and the contained haemocytes in this  
30 process. To dissect this process, we analysed colony blood flow patterns using time-lapse  
31 microscopy to obtain a quantitative description of the velocity, reversal pattern, and average  
32 distance travelled by haemocytes. We also observed that flows present during regeneration  
33 are powered by temporally and spatially synchronized contractions of the terminal ampullae.  
34 In addition, we revised previous studies on *B. leachii* haematology as well as asexual  
35 development using histological sectioning, and compared the role of haemocytes during  
36 whole-body regeneration. We found that regeneration starts with a rapid healing response  
37 characterized by blood clotting and infiltration of immunocytes, followed by increased  
38 activity of haemoblasts, recruitment of macrophage-like cells for clearing the tissues of debris,  
39 and their subsequent disappearance from the circulation concomitant with the maturation of  
40 a single regenerated adult. Overall, we provide a uniquely detailed account of the  
41 haematological properties of regenerating *B. leachii* colonies, providing novel lines of inquiry  
42 towards the decipherment of regeneration in chordates.

43

44 **Keywords:** *Botrylloides leachii*, haemocytes, haemolymph flow, histology, whole-body  
45 regeneration

## 46 **Introduction**

47 Whole-body regeneration (WBR) is the process whereby an entire functional adult is  
48 formed from only a minute fragment of the original organism. Multicellular animals capable of  
49 varying degrees of regeneration are distributed widely throughout the metazoa (Sánchez  
50 Alvarado and Tsonis, 2006), thus suggesting that this biological phenomenon has a primordial  
51 origin. However, this regeneration ability correlates inversely with body and tissue  
52 complexity (Alvarado, 2000; Rinkevich et al., 2007).

53 Among vertebrates, while most adults heal only through scarring, the teleost fish and  
54 urodele amphibians can regenerate tissues, body parts or organs following injury (Jaźwińska  
55 and Sallin, 2016; Seifert et al., 2012; Tanaka and Reddien, 2011). While the study of these  
56 organisms has brought an extensive knowledge of patterning and cellular programs required  
57 for regeneration in mature animals following severe injury, no vertebrate has yet been shown  
58 to undergo WBR. Therefore, deciphering the mechanisms underlying regeneration in  
59 evolutionarily related organisms might provide new implications about the basic principles of  
60 cellular plasticity in adult organisms of our phylum.

61 Colonial tunicates represent the closest phylogenetic relative of vertebrates (Delsuc et  
62 al., 2006) and can undergo WBR due to their high blastogenetic potential (Oka & Watanabe,  
63 1957, 1959; Milkman, 1967; Zaniolo et al., 1976; Rinkevich et al., 1995). Belonging to the  
64 Phylum Chordata, Class Ascidiacea, these invertebrates have tissue and organ complexity  
65 reminiscent of vertebrates (see Fig. 1), including a well-developed notochord, dorsal nerve  
66 cord, and a post-anal tail during their free-living tadpole larval stage. In particular,  
67 *Botrylloides leachii* (order Stolidobranchia, family Styelidae; Savigny, 1816) can undergo WBR  
68 in as little as 10 days (Rinkevich et al., 1995; Rinkevich et al., 2007, 2008, 2010; Zondag et al.,  
69 2016). Consequently, *B. leachii* has recently emerged as a model organism for the study of  
70 regeneration (Gross, 2007).

71 *B. leachii* are sessile suspension-feeding ascidians that live in clonal colonies of adults,  
72 termed zooids, which organize in a series of ladder-like parallel rows, known as systems (Fig.  
73 1 A-B; Brewin, 1946; Michaelsen, 1921; Savigny, 1816). The colony attaches to its substrate,  
74 typically underneath rocks in the shallow subtidal zone, through a gelatinous tunic. While  
75 each zooid has an independent heart and an open haemocoelic circulatory system, the entire  
76 colony shares a common vascular system that is embedded in the tunic and closed at its  
77 periphery by terminal ampullae, the contractile blind ends of marginal vessels (Fig. 1 C-F;  
78 Mukai et al., 1978). *B. leachii* zooids are hermaphrodites and can reproduce both sexually, to  
79 colonize new locations through a tadpole larval stage, or asexually, to expand the colony  
80 (Berrill, 1947; Mukai et al., 1987). This latter reproduction, also known as paleal budding  
81 (Oka and Watanabe, 1959) or blastogenesis (Brunetti, 1976), occurs on the outer epithelial  
82 mantle of a zooid, typically on both of its sides thus producing two offspring. These growing  
83 buds start as a thickened ring of cells on the body wall and invaginate to form the required  
84 layers of tissue for organ development. Eventually, these buds, located on either side of the  
85 older zooid, will mature into new adults (Berrill, 1947). As in the closely related genus  
86 *Botryllus* (Berrill, 1941; Sabbadin, 1969), bud development is synchronous throughout the  
87 colony and starts very early in the life cycle of the parent bud (Berrill, 1947; Brunetti, 1976).

88 In addition to these two methods of reproduction, *B. leachii* colonies can undergo WBR  
89 from a minute fragment of their vascular tissue (~200 cells; Rinkevich et al., 1995). WBR will  
90 only be triggered following the loss of all zooids from the colony; otherwise a more traditional  
91 injury healing will occur (Rinkevich et al., 1995). *Botrylloides leachii* WBR starts with the  
92 healing of the injury sites to prevent further haemolymph loss, followed by the compaction of  
93 the marginal ampullae towards the centre of the remaining matrix. Within this reorganized  
94 tissue, regeneration niches – a discrete regeneration locus within the vascular system – will  
95 develop and compete through a yet undetermined process that ultimately leads to the

96 development of a single adult zooid, while all other niches are absorbed by the colony (Fig. 1  
97 G). Importantly, WBR ability in *B. leachii* is retained throughout its developmental cycle (Oka  
98 and Watanabe, 1959; Rinkevich et al., 2007), in contrast to the sister species *Botryllus*  
99 *schlosseri*, where WBR potential is only present during a one-day period of their asexual  
100 reproduction cycle, known as takeover (Rinkevich et al., 2008; Voskoboynik et al., 2007).  
101 While the exact origin of the totipotent stem-like cells responsible for WBR remains unknown,  
102 it has been shown that even though they will develop a regeneration niche within the vascular  
103 system, they are not part of the circulating blood cells (haemocytes) in uninjured colonies but  
104 rather appear to migrate from the vascular lining into the vascular system after injury  
105 (Rinkevich et al., 2010).

106         Similar to most other chordates, ascidian haemocytes are continually renewed to  
107 compensate for cell death and external sources of loss (Ermak, 1982). The location of  
108 haemopoiesis in ascidians is still debated, which might be a consequence of the variety of  
109 developmental strategies observed among this clade (Brown and Swalla, 2012). In some  
110 solitary ascidians, it principally occurs in small static clusters of haemoblasts located in the  
111 lining of the haemocoel, particularly around the pharyngeal basket (Ermak, 1982). In colonial  
112 ascidians, clusters of undifferentiated cells with pluripotent properties, called islands, have  
113 been detected in the sub-endostylar ventral sinus (Voskoboynik et al., 2008). In addition,  
114 ventral islands located near the endostyle have been identified as sites of phagocyte turnover  
115 (Lauzon et al., 2013). Furthermore, circulating haemoblasts have been shown to express  
116 stemness and proliferation markers around early buds of *Botrylloides violaceus*, suggesting a  
117 circulatory source of haemocytes (Brown et al., 2009). It thus appears that there may be  
118 multiple sites for ascidian blood (haemolymph) production, in particular in colonial tunicates.

119         Haemolymph is mostly colourless and composed of a variety of cell types with  
120 functions reminiscent to that of vertebrates (Cima et al., 2002; Goodbody, 1975; Millar and

121 Ratcliffe, 1989; Wright, 1981); and its flow patterns are intimately linked to the health of the  
122 whole colony (Dijkstra et al., 2008).

123 Although there has been a number of studies investigating the morphotypes of  
124 ascidian haemocytes (Ballarin et al., 2011; Ballarin and Cima, 2005; de Leo, 1992; Endean,  
125 1960; Freeman, 1964; Hirose et al., 2003; Wright and Ermak, 1982), including of *B. leachii*'s  
126 (Cima et al., 2002), improved resolution and colour images would benefit future work on this  
127 species. In addition, no common terminology has been accepted to identify these cell types,  
128 mainly because of discrepancies between their phenotype and their function in different  
129 species, as well as a lack of understanding of their differentiation lineages (Ballarin et al.,  
130 2011; Cima et al., 2002; Endean, 1960; Freeman, 1964; Goodbody, 1975; Millar and Ratcliffe,  
131 1989; Wright, 1981). Furthermore, accurate identification is crucial for detecting and  
132 interpreting variations in the sub-populations of haemocytes during WBR.

133 Despite the major involvement of the remaining vascular system and the comprised  
134 haemocytes during WBR in *B. leachii*, no study has yet focused on the haematological aspects  
135 of regeneration. To obtain a more accurate understanding of the WBR process in *B. leachii*, we  
136 set out to characterize in a consistent and amended approach both uninjured and  
137 regenerating colonies at the circulatory, tissue, and cellular levels. We used both histological  
138 staining and time-lapse recording to dissect this highly dynamic process of regeneration with  
139 greater resolution.

## 140 **Materials and Methods**

### 141 **Animal husbandry and manipulation**

142 *Botrylloides leachii* colonies were collected from the two sites in the Otago Harbour  
143 (45°52'12"S, 170°31'48"E and 45°49'41"S, 170°38'29"E), and Nelson Harbour (41°15'36"S,  
144 173°16'48"E), New Zealand between September and March over 2014 to 2016. *B. leachii*  
145 grows naturally on submerged structures (e.g. ropes, pontoons, tyres), and colonies were  
146 removed from the attached substrata with a single edge razor blade. Each colony was placed  
147 on either 5.0 x 7.5-cm or 2.6 x 7.6-cm glass slides and left horizontally for two days in 200 ml  
148 of still seawater, changed daily, to allow the colony to attach to the slide. The slides were then  
149 placed vertically and kept at the Portobello Marine Laboratory (University of Otago) in a tank  
150 supplied with a constant flow-through of filtered seawater directly from the harbour, with  
151 temperature controlled between 18 °C and 20 °C. The glass slides were kept clear of algal  
152 growth by using a paintbrush and a single edge razor blade (after Rinkevich et al., 2007).  
153 Colonies were continuously fed, using a peristaltic pump, a 1:1:1:1 by volume mixture of three  
154 algae (*Chaetoceros muelleri*, *Pavlova lutheri* and *Tetraselmis chuii*) and a rotifer (*Brachionus*  
155 *plicatilis*) culture, complemented with Alltech All-G-Rich algae/yeast powder mix (12 g of  
156 Alltech All-G-Rich were added each week to the rotifer culture).

157 *B. leachii* haemolymph was collected as previously described (Cima, 2010). Briefly,  
158 whole colonies were first cleaned using filtered seawater (FSW) and incubated for 5 min in  
159 anticoagulant solution (0.38 g sodium citrate per 100 ml FSW, pH 7.5). To prevent loss of  
160 haemocytes, all instruments were incubated twice for 1 min in the anticoagulant solution  
161 prior to collection. Colonies were then dried using blotting paper and their marginal vessels  
162 broken using a needle. The haemolymph was then collected using a syringe and transferred  
163 into a 1.5-ml microfuge tube containing 100 µl of the anticoagulant solution up to a total  
164 volume of 600 µl. The tube was left 5 min on ice and the supernatant transferred to a new

165 tube to remove debris. Following centrifugation at 780 g for 12 min, the supernatant was  
166 discarded and the pellet re-suspended in 100 µl FSW.

167 *B. leachii* regeneration was carried out following an established protocol (Rinkevich et  
168 al., 2007). Dissection of adults and buds away from the marginal ampullae, during their mid-  
169 cycle blastogenic stage (i.e. not undergoing take-over), was carried out using a scalpel and a  
170 single edge razor blade. The slides with the remaining vascular fragments were then placed  
171 into an aerated seawater tank at 19 °C and left to regenerate until a certain morphological  
172 stage had been reached.

173

#### 174 **Histological staining**

175 *B. leachii* regenerating tissue fragments were fixed overnight in 4% paraformaldehyde  
176 (PFA) in FSW, dehydrated in 70 % ethanol (EtOH) and embedded in paraffin wax. The  
177 fragments were then sectioned (5 µm thickness) in the transverse plane. Three stains were  
178 used on dewaxed slides: haematoxylin and eosin (H&E), Giemsa, and Martius Scarlet Blue  
179 trichrome (MSB). H&E staining was performed as follows: stain for 4 min in haematoxylin  
180 (Leica Biosystems Surgipath Gill II Haematoxylin), wash for 2 min in running tap water, place  
181 the slide for 2 min in Scott's tap water (2 g of potassium bicarbonate, 20 g magnesium  
182 sulphate per litre), wash again for 2 min, stain for 30 s in eosin (Leica Biosystems Surgipath  
183 Eosin), wash for 1 min, dehydrate and mount. Giemsa staining was performed as follows:  
184 stain for 30 min in a coplin jar containing Giemsa (7.36 g Giemsa powder in 500 ml of 50 °C  
185 glycerol and 500 ml methanol, mix 1:45 in dH<sub>2</sub>O) within a 56 °C waterbath, rinse in dH<sub>2</sub>O,  
186 differentiate in 1/1500 acetic acid solution, rinse in dH<sub>2</sub>O, dehydrate and mount. MSB staining  
187 was performed as follows: stain for 5 min in Celestine blue (5 g ferric ammonium sulphate,  
188 0.5 g Celestine Blue B in 100 ml dH<sub>2</sub>O with 14 ml glycerol), wash for 30 s in running tap water,  
189 stain for 5 min in haematoxylin, wash again for 2 min, place the slide for 2 min in Scott's tap



190 water, wash for 2min, rinse for 1min in 95 % ethanol, stain for 2 min in martius yellow (20 g  
191 phosphotungstic acid, 5 g martius yellow per litre of 95 % ethanol), rinse three times for 1  
192 min in dH<sub>2</sub>O, stain for 10 min in brilliant scarlet (10 g brilliant scarlet crystal ponceau 6R, 20  
193 ml glacial acetic acid per litre of dH<sub>2</sub>O), rinse again three times, place the slide for 4 min in  
194 phosphotungstic acid (10 g per litre of dH<sub>2</sub>O), rinse for 1 min in dH<sub>2</sub>O, stain for 45 s in methyl  
195 blue (5 g methyl blue, 10 ml glacial acetic acid per litre of dH<sub>2</sub>O), rinse for 1 min in acetic acid  
196 (10 ml glacial acetic acid per litre of dH<sub>2</sub>O), dehydrate and mount.

197 Haemolymph smears were obtained as previously described (Cima, 2010). Briefly,  
198 drops of 50 µl of isolated haemocytes (see above) were left for 30 min to attach on SuperFrost  
199 Plus (Thermo Fisher Scientific) microscopy slides. The drop was then discarded by placing the  
200 slide vertically and the remaining attached cells were fixed for 30 min at 4 °C in ascidian  
201 fixative solution (1 g NaCl and 1 g sucrose in 1 % glutaraldehyde in FSW). Slides were then  
202 rinsed for 10 min in 0.1 M PBS, stained using 10 % Giemsa, mounted using a 9:1 glycerol-PBS  
203 solution and sealed with a coverslip using nail polish.

204

## 205 **Imaging**

206 All fixed samples were imaged on an Olympus AX70 microscope equipped with a  
207 QImaging MicroPublisher 5.0 2560 x 1920 pixels camera using QCapture. Magnification used  
208 ranged from 4 x to 100 x. Time-lapse recordings of haemolymph flow in live colonies were  
209 acquired on a Leica M205 FA stereo-microscope equipped with an 8 megapixel CCD DFC490  
210 colour camera using the Leica Application Suite (LAS). Recordings were acquired using the  
211 “Movie” continuous mode, at different magnifications (7.42 x to 20 x) and exposure times  
212 (27.7 ms to 55.7 ms) adapted to the recorded portions of the colony, with a resolution of  
213 either 544 x 408 or 1088 x 816 pixels.

214

## 215 **Data processing**

216 Acquired images were processed for colour balance using the open-source Gimp  
217 program ([www.gimp.org](http://www.gimp.org)) and assembled into figures using the open-source Inkscape  
218 software ([www.inkscape.org](http://www.inkscape.org)). Colours were chosen according to the ColorBrewer palette  
219 ([www.colorbrewer2.org](http://www.colorbrewer2.org)). Movies were montaged using the Lightworks program  
220 ([www.lwks.com](http://www.lwks.com)) and compressed using the open-source HandBreak tool  
221 ([www.handbreak.fr](http://www.handbreak.fr)).

222 Haemolymph composition during WBR was estimated by manually identifying cell  
223 types in microscopy images using five randomly located images of Giemsa stained ampullae,  
224 at a 60-x magnification. Similarly, 10 images were used to characterize haemolymph  
225 composition in intact colonies fixed during their mid-cycle blastogenic stage. Only cells  
226 located inside the ampullae, centred on the imaged section and unambiguously identified  
227 (2.6 % of the total 2339 cells could not be determined) were considered. Between 272 and  
228 447 cells were positively identified for each stage of regeneration, 502 for the intact colony.  
229 We focused our counting on ampullae for setting up a meaningful comparison between intact  
230 and regenerating tissues as blood vessels become very sparse after tissue contraction (i.e.  
231 stage 3, see Fig. 5).

232 The appearance of haemocytes was characterized using light microscopy by smearing  
233 ascidian haemolymph and by staining histological sections of whole colonies.

234

## 235 **Computational analysis**

236 Vessel identification in time-lapse recordings was performed as follows. Raw frames  
237 (Fig. S1 A) of the recording were smoothed using a Gaussian kernel of radius 0.89  $\mu\text{m}$ , the  
238 difference between consecutive frames was computed (Fig. S1 B) and moving cells were  
239 identified as having an absolute value greater than 6 x the estimated standard deviation of the

240 image's white noise (Fig. S1 C; Paul et al., 2010). Cells larger than  $5 \mu\text{m}^2$  were then  
241 consecutively morphologically dilated and eroded, using structuring disks of radii  $41 \mu\text{m}$  and  
242  $21 \mu\text{m}$ , respectively. The resulting detections were then averaged over the entire recording  
243 (Fig. S1 D), and vessels defined as containing moving cells in at least 30 % of the frames (Fig.  
244 S1 E). The location, length and width the vascular systems were then identified using the  
245 morphological skeleton of the vessels (Fig. S1 F).

246 Haemolymph flow was measured using a particle image velocimetry (PIV) approach  
247 with multiple passes and subpixel resolution using Fourier-space (Liao and Cowen, 2005)  
248 based on the difference between consecutive frames. Raw frames of the recording were  
249 smoothed using a Gaussian kernel of radius  $0.89 \mu\text{m}$ , the difference between consecutive  
250 frames was computed (Fig. S1 G-I) and PIV performed between two consecutive differences,  
251 using a modified version of `matpiv_nfft` from the MatPIV toolbox  
252 (<http://folk.uio.no/jks/matpiv/index2.html>), through four consecutive passes with  
253 interrogation windows of sizes  $83 \times 83$ ,  $62 \times 62$ ,  $41 \times 41$  and  $21 \times 21 \mu\text{m}$ ; and finalized with a  
254 subpixel pass in Fourier-space (Fig. S1 J & K). Only the speeds measured inside the previously  
255 detected vessel segments were retained and projected onto the tangent of the segment. The  
256 orientation of each segment was then adjusted based on the maximal correlation between  
257 average speeds. Speeds from all aligned segments were then binned into a 2D histogram of  
258 resolution  $350 \text{ ms} \times 6 \mu\text{m/s}$ , and the most likely haemolymph flow was computed using a  
259 shortest path approach (Dijkstra, 1959), implemented using dynamic programming (Fig. S1 L;  
260 Bellman, 1952). Finally, to dampen the effect of the binning required by dynamic  
261 programming, the resulting haemolymph flow was smoothed using cubic smoothing splines  
262 (Fig. S1 L).

263 Ampullar contractions were measured as follows. We first identified ampullae in every  
264 frame (Fig. S2 A) as regions darker than  $20 \times$  the estimated standard deviation of the image's

265 white noise (Paul et al., 2010). The resulting binarized image was then consecutively  
266 morphologically opened and closed, using a structuring disk of radius 9.5  $\mu\text{m}$  (Fig. S2 B). The  
267 area and the centroid of each separated object was computed (Fig. S2 C), and the trajectory of  
268 each ampulla was reconstructed by clustering across frames detections whose centroids were  
269 closer than 19  $\mu\text{m}$  (Fig. S2 D). Only trajectories that spanned more than 95 % of the frames  
270 were kept for further analysis. All the code written for our analysis was implemented as a set  
271 of custom MATLAB R2015b (MathWorks) functions and is available upon request.

## 272 **Results**

### 273 **Haemolymph circulation**

274 As a first step towards dissecting WBR, we characterized the haematological  
275 properties of a healthy and intact adult colony of *B. leachii* (Fig. 1 A-B). Haemolymph  
276 circulation in suspension-feeding ascidians undergoes a periodic reversal of flow direction  
277 between advisceral (towards the viscera) and abvisceral (towards the branchial basket). The  
278 advisceral flow starts on the anterior side of the heart, moves towards the endostyle before  
279 arriving to the pharynx and the mid-dorsal vessel, which supplies haemolymph to the  
280 digestive tract, and lastly passes to the dorsal end of the heart (Mukai et al., 1978).

281 Utilising the transparency of the tunic, we recorded time-lapse stereomicroscopy data  
282 from eight colonies at different locations in their vascular system (Fig. 1 C-F, Movies S1).  
283 Focusing on the largest vessels of the colony (Movie S1-S2), we gathered a set of reproducible  
284 flow measurements (n=9, from 5 different colonies) that allowed us to calculate, using a  
285 custom-made PIV-based tracking software, the flow (peak velocity  $\sim 200\mu\text{m/s}$ ) and reversal  
286 rates ( $\sim 57/24$  s) of a *B. leachii* colony (Fig. 2 A & Fig. S1).

287 When recording vascular junctions, we observed (Movie S1) and quantified (Movie S3)  
288 an apparently pseudo-erratic pattern at the time of flow reversal. By examining terminal  
289 vessels (Movie S1), we extracted valuable information on the rate ( $11.4 \pm 5.3 \mu\text{m}^2/\text{s}$ , n=18)  
290 and extent (dilated/contracted surface ratio:  $1.55 \pm 0.26$ , n=12) of the ampullar contraction-  
291 dilatation cycle concomitant with haemolymph flow in ascidians (Mukai et al., 1978). While  
292 the general timing of haemolymph and ampullae alternation is synchronized (average lag:  $2.9$   
293  $\pm 2.5$  s, n=24), small variations on the exact time of contraction for each ampulla could be  
294 measured ( $\pm 3.1$  s, n=24, Fig. 2 B & Fig. S2).

295

### 296 **Haemocyte classification**

297 By combining previous classification schemes for botryllid ascidians (Ballarin et al.,  
298 2011; Ballarin and Cima, 2005; Cima et al., 2002; Hirose et al., 2003), we propose a  
299 generalized classification of *B. leachii* circulatory haemocytes into five functional groups:  
300 undifferentiated cells, immunocytes, mast cell-like cells, transport cells and storage cells  
301 (Table 1). A further detailed description of the observed cell types is provided in Table S1. In  
302 this classification, undifferentiated cells are composed solely of haemoblasts, also called  
303 lymphocytes or lymphocyte-like cells. Immunocytes can be further classified between  
304 phagocytes and cytotoxic cells. Phagocytes include hyaline amoebocytes and macrophage-like  
305 cells while cytotoxic cells include granular amoebocytes and morula cells. Mast-like cells are  
306 represented only by granular cells. Transport cells are composed of compartment  
307 amoebocytes and compartment cells. Finally, storage cells include both pigment cells and  
308 nephrocytes. A comprehensive guide to haemocyte identification using bright field Giemsa  
309 stained images is provided (Table 2), with high magnification pictures exemplifying the most  
310 common aspect of each cell type (Fig. 3).

311 Altogether, these descriptions (Table 2) and images (Fig. 3) allowed us to identify most  
312 of the cells both in haemolymph smears and histological sections and provide an  
313 unambiguous identification reference for the analysis of the localization and fate of *B. leachii*  
314 haemocytes in the colony.

315

### 316 **Asexual budding**

317 To obtain a precise picture of the prevailing mode of asexual reproduction, we revised  
318 various stages of blastogenesis in *B. leachii* previously described by Berrill (1941, 1947) using  
319 histological sections. Palleal reproduction involves the formation of a new bud from the  
320 peribranchial epithelium of a zooid. Remarkably, in *B. leachii* as well as in other colonial  
321 botryllid, because blastogenesis starts very early in the development of a maturing bud, there

322 are typically three generations co-existing in the colony (Fig. 4 A): second-generation buds  
323 (budlets), developing from more differentiated buds (first-generation buds), themselves  
324 attached to adult filter-feeding zooids (blastozooids).

325         The first visible sign of blastogenesis is the appearance of a bud disc, a thickened disk  
326 of cells on the ventral side of the atrial epithelium of a first-generation bud, just before the  
327 stage where its stigmata become perforated. In healthy colonies, one bud disc usually appears  
328 on each side of the forming pharyngeal basket (Fig. 4 B), thus producing two budlets and  
329 increasing the overall size of the colony. In well-fed colonies, one of these buds can even  
330 divide to give rise to two buds on one side of the zooid, producing one further zooid (Berrill,  
331 1947). The disc cells then proliferate until the bud reaches around 12 cells of diameter (day 1  
332 of the second-generation development), protrudes outside of the first-generation bud through  
333 its mantle into the tunic (Fig. 4 C) and curves to form a hollow sphere of cells inside a mantle  
334 pouch highly reminiscent of the early stages of blastogenesis (days 2-3). This pouch connects  
335 the growing bud with the haemocoel of the mother bud, ensuring that haemolymph and  
336 oxygen reach the new bud while the rudiment for the vascular connection to the rest of the  
337 colony will be initiated underneath by an outgrowth of the epithelium layer (Berrill, 1947),  
338 later producing the radial vessel (Burighel and Brunetti, 1971).

339         The asexually developing bud continues to increase in size and begins to fold, forming  
340 three main compartments, which will form the internal structures of the new adult (days 4-6,  
341 Fig. 4 D). It is at that stage that the first signs of germ cells can also be observed (Fig. 4 D). The  
342 folds will ultimately join, creating the basic structure for the pharyngeal basket (days 7-8).  
343 Once the extending pharyngeal basket has joined the stomach and started to produce its first  
344 imperforated stigmata, the stereotypical body plan of the zooid is completed, thus becoming a  
345 first-generation bud on which new budlets start to appear (day 9, Fig. 4 E). Following this  
346 stage, the first-generation bud will differentiate into a fully functional zooid hence growing in

347 size, finalizing its various organs and vascular system (days 10-22, Fig. 4 F), starting its  
348 cardiac activity around day 17.

349 In total, it takes approximately 22 days at 17 °C to produce a functioning zooid through  
350 blastogenesis (Berrill, 1947). Afterwards, the zooid will feed for another 8 days before it gets  
351 resorbed through a whole-body apoptosis (< 3 days), in which numerous large macrophage-  
352 like cells infiltrate and remove effete cells from the senescent tissues (Brunetti, 2009) and the  
353 next generation succeeds.

354

### 355 ***B. leachii* whole-body regeneration**

356 The vascular and haematological characteristics of WBR in *B. leachii*, are described  
357 through comparisons with blastogenesis and intact colonies (Fig. 5). For this analysis, we  
358 follow a published classification of WBR into 5 stages (Fig. 1 G; Zondag et al., 2016): Stage 0,  
359 injury of the colony; Stage 1, healing of the injury; Stage 2, remodelling of the vascular system;  
360 Stage 3, condensation of the ampullae; Stage 4, establishment and development of  
361 regeneration niches; Stage 5, fully regenerated zooid.

362

#### 363 *Stage 0: Injury (0 h)*

364 *B. leachii* has a great capacity for preventing haemolymph loss from injuries, with  
365 haemolymph loss stopped in less than 30 s by a combination of tissue contraction and clotting  
366 (Movie S4). Upon ablation of the zooids, the remaining vascular tissue initially loses a small  
367 volume of haemolymph but quickly contracts its peripheral vessels to halt the oozing and  
368 starts clotting (Fig. 5 A). Flow will then restart after a pause, the duration of which is  
369 seemingly related to either the number of ampullae or the amount of vascular tissue, but was  
370 consistently shorter than 10 min. We observed restart of haemolymph flow in as little as two  
371 minutes (Movie S4), starting in the portion of the tissue furthest away from the injury in an



372 erratic yet bidirectional fashion, and progressively re-spanning almost the entire vascular  
373 system (Movie S4). Although driven only by ampullar contractions, this novel haemolymph  
374 flow exhibits a reversal frequency similar to that of intact vessels in a whole colony. As  
375 suspected, given the short amount of time available for new cellular differentiation, the  
376 composition of this haemolymph is almost identical to the one from intact colonies, with a  
377 slight increase in the population of granular cells (Fig. 5 G).

378

#### 379 *Stage 1: Wound healing (15 h)*

380 At this stage of WBR, a dramatic amount of extravascular cellular activity is taking  
381 place. The two most apparent aspects are the infiltration of morula cells into the tunic and the  
382 remodelling of the tunic matrix (Fig. 5 B). When focusing on circulating haemocytes, we  
383 observed an incipient decrease in the population of morula cells, accompanied with an  
384 increase in the populations of haemoblasts, hyaline amoebocytes, and granular cells (Fig. 5 G).

385

#### 386 *Stage 2: Ampulla remodelling (24 h)*

387 Concomitant with the observed wound healing process, terminal ampullae start  
388 changing their elongated shape to a more spheroid form, contracting, and creating novel tunic  
389 vessels (Fig. 5 C; Rinkevich et al., 1995; Rinkevich et al., 2007). One day after injury,  
390 previously reported giant cells (Rinkevich et al., 1995, 2007) could be observed throughout  
391 the vascular system (Fig. 5 C). In addition, this step exhibits the first signs of the subsequent  
392 increase in phagocytic cells (Fig. 5 G).

393

#### 394 *Stage 3: Tissue contraction (2 - 4 d)*

395 By stage 3, the vascular system had fully contracted into a dense network (Rinkevich et  
396 al., 1995, 2007) and various regeneration niches were visible within the tissue (Fig. 5 D).

397 Regeneration niches are defined as spherical aggregates of cells within the vascular lumen.  
398 Probably the most striking change, at this stage of WBR, was the large increase in phagocytic  
399 cells (Fig. 5 D & G), while numbers of both haemoblasts and differentiating cells had returned  
400 to pre-injury levels (Fig. 5 G).

401

#### 402 *Stage 4: Regeneration niches (5 - 7 d)*

403 During stage 4, several regeneration niches were present and the foundation of an  
404 adult could be observed within one of them (Fig. 5 E). Nonetheless, only one zooid will  
405 regenerate and the less developed niches will be resorbed (Rinkevich et al., 1995, 2007).  
406 Advanced niches already displayed well developed axial and tissue organizations reminiscent  
407 of the early first-generation stage of blastogenesis (Fig. 4 E), including an endostyle as well as  
408 an imperforated pharyngeal basket (Fig. 5 E). In comparison to palleal budding, the  
409 regenerating buds were lacking both an interstitial space around the niche and visible  
410 gametes (compare Fig. 4 E and Fig. 5 E).

411 At this stage of WBR, haemolymph flow can be observed in novel tunic vessels (Movie  
412 S5), and the composition of the haemolymph strives towards the composition observed in  
413 intact colonies. Transport, mast-cell like, and storage cells are at their lowest during this  
414 period while hyaline amoebocytes and macrophage-like cells remain at a higher proportion  
415 than in uninjured colonies (Fig. 5 G).

416

#### 417 *Stage 5: Regenerated zooid (8 - 10 d)*

418 At the conclusion of WBR, a single fully functional zooid is regenerated, displaying the  
419 palleal buds expected from an uninjured adult (Fig. 5 F). The haemolymph composition of this  
420 new adult is largely similar to that of an intact colony, albeit with a slightly smaller phagocytic  
421 cell population (Fig. 5 G).

## 422 **Discussion**

423

424 Here, we carefully dissected the haematological and histological properties of both  
425 intact and regenerating *B. leachii* colonies. We compared haemolymph flow patterns to  
426 published data from related ascidian species and revised previous studies on *B. leachii*  
427 asexual development. In addition, we followed the quantity and location of each type of  
428 haemocyte during whole-body regeneration, finding that regeneration progresses through a  
429 rapid healing response, an increased activity of haemoblasts, the recruitment of macrophage-  
430 like cells and finally their clearing from the haemolymph.

431

## 432 **Synchronization of blood flow in intact and regenerating colonies**

433 Using time-lapse recording, we were able to quantify the complex haemolymph flow  
434 patterns observed within a *B. leachi* colony. While the velocity of haemolymph in ascidians  
435 has to our knowledge not yet been estimated, the measured average velocity predicts that  
436 haemocytes travel an average of 8 mm during one alternation of the flow. In such a small  
437 organism (~2 mm in length), this range could be critical for spreading signalling metabolites  
438 and thus potentially coordinating colony responses. The values we obtained for the reversal  
439 rates are similar to those measured in other ascidian species, albeit slightly more asymmetric  
440 and with a relatively shorter advisceral period (21 to 36 s in *B. leachi*, 30 to 50 s in *Botryllus*  
441 *primigenus* and 45 to 60 s in *Symplegma reptans*; Mukai et al., 1978). We also observed a quick  
442 reestablishment of a regular haemolymph flow after injury, and despite the removal of all  
443 zooids from the vascular system. This flow is thus sustained solely by synchronized and  
444 localized patterns of ampullar contractions (Fig. 2 C & Fig. S3, Movie S4-S5). While this  
445 synchronization could solely be a consequence of haemolymph pressure and elastic vascular

446 tissue (Mukai et al., 1978), the absence of any zooid heart within the tunic suggests the  
447 existence of a yet unidentified stimulus coordinating this activity.

448         Similar to vertebrates (Miquerol and Kelly, 2013), *B. leachii* heart activity starts before  
449 the zooid is fully mature, when neither capable of filter feeding nor of using most of its other  
450 organs. Early heart function is consistent with the necessity to circulate oxygen and nutrients  
451 throughout the developing organism, even though the parental heart is connected directly to  
452 the haemocoel of the bud and would appear to be sufficient for sustaining such circulation. In  
453 fact, the pressure exerted by the parental heart is strong enough to impose its direction and  
454 reversal rate onto the daughters' heart (Burighel and Brunetti, 1971).

455

#### 456 **Morphological and cellular changes during distinct phases of *B. leachii* WBR**

457         We additionally characterised the morphological and haematological modulation of  
458 injured colonies throughout WBR. Morula cells are known constituents of the immune system  
459 involved in inflammatory responses, haemolymph clotting, homeostasis, and tunic repair  
460 (Ballarin et al., 2011, 2001; de Leo, 1992; Menin et al., 2005). The large number of infiltrated  
461 morula cells observed during stage 1 of WBR highlights a need for both clearance of decaying  
462 or foreign debris and reorganization of the injured vascular system during the first 15 h post  
463 dissection. In addition, we measured an increase in the population of differentiating cells  
464 (Fig. 5 G), consistent with the need to re-establish homeostasis within the *B. leachii*  
465 vasculature and to compensate for haemolymph loss. An increased number of mast cell-like  
466 cells, a cell type apparently absent from related ascidian species (Cima et al., 2002), was also  
467 observed. While their role remains unclear, two hypothesis have been proposed: either a  
468 source of nourishment or the immunosurveillance of the alimentary tract (Cima et al., 2002).  
469 Their presence during WBR, in the absence of any feeding zooid, rather supports a nutritive  
470 role.

471 At stage 2, we observed the first signs of the subsequent increase in phagocytic cells,  
472 potentially as a result of the previously observed differentiation activity (Fig. 5 G) and of the  
473 inflammatory response induced by the morula cells (Fig. 5 B). Given the role of these  
474 macrophage-like cells in the removal of foreign elements from the tissue (de Leo, 1992), their  
475 presence during stage 3 of WBR points towards a recruitment for undertaking the clearing of  
476 bacteria, dead cells, and residues of remodelled tunic. The concomitant reduction of  
477 haemoblasts to pre-injury levels suggests that the wound healing and remodelling phase has  
478 been completed, and that cellular proliferation as well as differentiation have returned to  
479 haemopoietic levels within the vascular system. Finally, during stage 4, mast cell-like,  
480 transport, and storage cells were observed at their lowest level throughout WBR. This could  
481 be a direct consequence of the imposed absence of feeding, leading to a lack of nutrients to be  
482 transported or stored. Regenerating *B. leachii* colonies would then need to obtain nutrients in  
483 an alternative way. Similar to reactivation of hibernating colonies (Burighel et al., 1976) and  
484 to the takeover of a new generation of buds in *Botryllus schlosseri* (Lauzon et al., 2002),  
485 extraction of reserve nutrients from macrophage-like cells would supplement this need and  
486 gradually reduce the number of phagocytic cells, as observed experimentally (Fig. 5 G).

487 When focusing on vascular circulation, the initial rapid interruption in haemolymph  
488 flow (Movie S4) could be a consequence of either the reduced density of haemolymph inside  
489 the vascular system, or an actively regulated mechanism to reduce the pressure at the  
490 sectioned vessels and aiding clotting. Given that haemolymph flow restarts over a relatively  
491 short time scale compared to that necessary for substantial haemocytes production and  
492 pressure increase, the latter hypothesis appears more likely. This observation thus further  
493 supports the existence of an unidentified stimulus systemic to the entire vascular system,  
494 potentially relayed directly by the epithelial cells lining the vasculature (Mukai et al., 1978).

495 In our histological samples, we have observed a detachment of the vascular lining  
496 throughout, including in intact colonies (Fig. S4). This suggests that this detachment  
497 phenomenon, which has been described as the initial establishment of a regeneration niche  
498 (Rinkevich et al., 2007), is either a symptom of vascular remodelling that takes place naturally  
499 in healthy colonies but was somehow not prominent in our regenerating vascular tissues, or  
500 an artefact of the fixation procedure. Given that we did not consistently detect the reported  
501 precursory accumulation of haemocytes at the vascular lining, the latter hypothesis appears  
502 more likely, and we suggest that these peripheral cells are morula cells responding to an  
503 inflammatory response at the early stages of infiltration.

504

#### 505 **Similarities and divergences between blastogenesis and WBR**

506 The two major discrepancies between these two processes were the absence during  
507 WBR of an interstitial space around the niche and a lack of visible gametes (Fig. 5 E). As WBR  
508 restores both the soma and the germ line (Rinkevich et al., 1995, 2007), the absence of  
509 gametes in regenerating niches indicates that they will be created during subsequent cycles of  
510 blastogenesis. This process may be an energetically economical developmental approach that  
511 avoids the production of gametes in niches that could subsequently be resorbed. Overall, once  
512 the vascular tissue has fully contracted, the timing of WBR initially relates closely to that of  
513 blastogenesis (day 1-8), but ultimately produces a functional adult much faster. One potential  
514 cause for such increased speed is the temperature at which the regenerating colonies were  
515 kept (~19 °C in the present study), which is known to directly correlate with developmental  
516 pace (Berrill, 1947, 1941). Temperature alone may not entirely explain such difference in  
517 timing however, and one likely cause could be that functional regenerated zooids are smaller  
518 than palleal ones, thus having a shortened growth phase which normally spans more than half

519 of blastogenesis. Indeed, such reduction in zooid size was observed in *Botryllus schlosseri*  
520 (Voskoboynik et al., 2007).

521

## 522 **Conclusion**

523 Overall, this study underlines the complex interplay of mechanisms required for  
524 successful WBR, and complements previous morphological studies (Rinkevich et al., 1995,  
525 2007) by providing a higher temporal resolution. Our histological analysis of WBR supports  
526 our recent sequencing approach that identified an initial healing phase followed by a  
527 regeneration response (Zondag et al., 2016) and have provided the first detailed account of  
528 the haematological properties of *Botrylloides leachii* colonies throughout whole-body  
529 regeneration.

530 **Compliance with Ethical Standards**

531 Conflict of Interest: The authors declare that they have no conflict of interest. Informed  
532 consent was obtained from all individual participants included in the study. All applicable  
533 international, national, and/or institutional guidelines for the care and use of animals were  
534 followed. All permissions required for this study have been obtained.

535

536 **Acknowledgements**

537 We would like to thank Francesca Cima (Department of Biology, University of Padova)  
538 for pieces of advice, protocols and general help on haemocytes, as well as for proofreading  
539 this article; Rueben Pooley (Department of Marine Science, University of Otago) for his help in  
540 animal husbandry; Lorryn Fisher (Department of Anatomy, University of Otago) for providing  
541 the PCNA antibody; Noel Jhinku (Department of Pathology, University of Otago) for providing  
542 the rotifers; Kendall Gadowski (Department of Marine Science, University of Otago) for  
543 providing the All-G-Rich powder; Kristian Sveen (Institute for Energy Technology, University  
544 of Oslo) for developing the original code of MatPIV; Cynthia A. Brewer (GeoVISTA Center,  
545 Pennsylvania State University) for developing ColorBrewer; Fernando Romero Balestra  
546 (Department of Cell Signalling, CABIMER), Aude Blanchoud and Anna Jaźwińska (Department  
547 of Biology, University of Fribourg), for proofreading this article.

548 The project was supported by a Dean's Bequest Grant and by the Department of  
549 Anatomy [Otago University]; S.B. by the Swiss National Science Foundation (SNSF) [grant  
550 number P2ELP3\_158873]; and L.Z. by a University of Otago Post-graduate scholarship.



## 551 References

- 552 Alvarado, A.S., 2000. Regeneration in the metazoans: why does it happen? *BioEssays* 22, 578–590.  
553 doi:10.1002/(SICI)1521-1878(200006)22:6<578::AID-BIES11>3.0.CO;2-#
- 554 Ballarin, L., Cima, F., 2005. Cytochemical properties of *Botryllus schlosseri* haemocytes: indications for morpho-  
555 functional characterisation. *Eur. J. Histochem.* 49, 255–64. doi:10.4081/952
- 556 Ballarin, L., del Favero, M., Manni, L., 2011. Relationships among hemocytes, tunic cells, germ cells, and accessory  
557 cells in the colonial ascidian *Botryllus schlosseri*. *J. Exp. Zool. Part B Mol. Dev. Evol.* 316B, 284–295.  
558 doi:10.1002/jez.b.21400
- 559 Ballarin, L., Franchini, A., Ottaviani, E., Sabbadin, A., 2001. Morula cells as the major immunomodulatory  
560 hemocytes in ascidians: Evidences from the colonial species *Botryllus schlosseri*. *Biol. Bull.* 201, 59–64.  
561 doi:10.2307/1543526
- 562 Bellman, R., 1952. On the theory of dynamic programming. *Proc. Natl. Acad. Sci. U. S. A.* 38, 716–9.
- 563 Berrill, N.J., 1947. The developmental cycle of Botrylloides. *Q. J. Microsc. Sci.* 88, 393–407.
- 564 Berrill, N.J., 1941. The development of the bud in Botryllus. *Biol. Bull.* 80, 169. doi:10.2307/1537595
- 565 Brewin, B.I., 1946. Ascidians in the vicinity of the Portobello Marine Biological Station, Otago Harbour. *Trans. R.*  
566 *Soc. New Zeal.* 76, 87–131.
- 567 Brown, F.D., Keeling, E.L., Le, A.D., Swalla, B.J., 2009. Whole body regeneration in a colonial ascidian, *Botrylloides*  
568 *violaceus*. *J. Exp. Zool. B. Mol. Dev. Evol.* 312, 885–900. doi:10.1002/jez.b.21303
- 569 Brown, F.D., Swalla, B.J., 2012. Evolution and development of budding by stem cells: Ascidian coloniality as a case  
570 study. *Dev. Biol.* 369, 151–162. doi:10.1016/j.ydbio.2012.05.038
- 571 Brunetti, R., 2009. Botryllid species (Tunicata, Ascidiacea) from the Mediterranean coast of Israel, with some  
572 considerations on the systematics of Botryllinae. *Zootaxa* 2289, 18–32.
- 573 Brunetti, R., 1976. Biological cycle of *Botrylloides leachi* (Savigny) (Ascidiacea) in the Venetian lagoon. *Vie Milieu*  
574 XXVI, 105–122.
- 575 Burighel, P., Brunetti, R., 1971. The circulatory system in the blastozoid of the colonial ascidian Botryllus  
576 Schlosseri (Pallas). *Bolletino di Zool.* 38, 273–289. doi:10.1080/11250007109429158
- 577 Burighel, P., Brunetti, R., Zaniolo, G., 1976. Hibernation of the colonial ascidian Botrylloides leachi (Savigny):  
578 histological observations. *Ital. J. Zool.* 43, 293–301. doi:10.1080/11250007609430146
- 579 Cima, F., 2010. Microscopy methods for morpho-functional characterisation of marine invertebrate haemocytes.  
580 *Microsc. Sci. Technol. Appl. Educ.* 1100–1107.
- 581 Cima, F., Perin, A., Burighel, P., Ballarin, L., 2002. Morpho-functional characterization of haemocytes of the  
582 compound ascidian *Botrylloides leachi* (Tunicata, Ascidiacea). *Acta Zool.* 82, 261–274. doi:10.1046/j.1463-  
583 6395.2001.00087.x
- 584 de Leo, G., 1992. Ascidian hemocytes and their involvement in defence reactions. *Bolletino di Zool.* 59, 195–214.  
585 doi:10.1080/11250009209386669
- 586 Delsuc, F., Brinkmann, H., Chourrout, D., Philippe, H., 2006. Tunicates and not cephalochordates are the closest  
587 living relatives of vertebrates. *Nature* 439, 965–968. doi:10.1038/nature04336
- 588 Dijkstra, E.W., 1959. A note on two problems in connexion with graphs. *Numer. Math.* 1, 269–271.  
589 doi:10.1007/BF01386390
- 590 Dijkstra, J., Dutton, A., Westerman, E., Harris, L.G., 2008. Heart rate reflects osmotic stress levels in two  
591 introduced colonial ascidians *Botryllus schlosseri* and *Botrylloides violaceus*. *Mar. Biol.* 154, 805–811.  
592 doi:10.1007/s00227-008-0973-4
- 593 Endean, R., 1960. The blood-cells of the ascidian, Phallusia Mammillata. *J. Cell Sci.* s3-101, 177–197.
- 594 Ermak, T.H., 1982. The renewing cell populations of ascidians. *Am. Zool.* 22, 795–805. doi:10.1093/icb/22.4.795
- 595 Freeman, G., 1964. The role of blood cells in the process of asexual reproduction in the tunicate *Perophora viridis*.  
596 *J. Exp. Zool.* 156, 157–183. doi:10.1002/jez.1401560204
- 597 Goodbody, I., 1975. The physiology of ascidians. *Adv. Mar. Biol.* 12, 1–149. doi:10.1016/S0065-2881(08)60457-5
- 598 Gross, L., 2007. From one to many and back again: a systemic signal triggers tunicate regeneration. *PLoS Biol.* 5,  
599 e98. doi:10.1371/journal.pbio.0050098
- 600 Hirose, E., Shirae, M., Saito, Y., 2003. Ultrastructures and classification of circulating hemocytes in 9 botryllid  
601 ascidians (chordata: ascidiacea). *Zoolog. Sci.* 20, 647–656. doi:10.2108/zsj.20.647
- 602 Jaźwińska, A., Sallin, P., 2016. Regeneration versus scarring in vertebrate appendages and heart. *J. Pathol.* 238,  
603 233–246. doi:10.1002/path.4644
- 604 Lauzon, R.J., Brown, C., Kerr, L., Tiozzo, S., 2013. Phagocyte dynamics in a highly regenerative urochordate:  
605 insights into development and host defense. *Dev. Biol.* 374, 357–73. doi:10.1016/j.ydbio.2012.11.006
- 606 Lauzon, R.J., Ishizuka, K.J., Weissman, I.L., 2002. Cyclical generation and degeneration of organs in a colonial  
607 urochordate involves crosstalk between old and new: A model for development and regeneration. *Dev. Biol.*  
608 249, 333–348. doi:10.1006/dbio.2002.0772

- 609 Liao, Q., Cowen, E.A., 2005. An efficient anti-aliasing spectral continuous window shifting technique for PIV. *Exp. Fluids* 38, 197–208. doi:10.1007/s00348-004-0899-7
- 610
- 611 Menin, A., Favero, M., Del Cima, F., Ballarin, L., 2005. Release of phagocytosis-stimulating factor(s) by morula
- 612 cells in a colonial ascidian. *Mar. Biol.* 148, 225–230. doi:10.1007/s00227-005-0081-7
- 613 Michaelsen, W., 1921. Die Botrylliden und Didemniden der Nordsee und der zur Ostsee führenden
- 614 Meeresgebiete. *Wissenschaftliche Meeresuntersuchungen (Abteilung Helgoland)* 14, 99–124.
- 615 Milkman, R., 1967. Genetic and developmental studies on *Botryllus schlosseri*. *Biol. Bull.* 132, 229.
- 616 doi:10.2307/1539891
- 617 Millar, D.A., Ratcliffe, N.A., 1989. The evolution of blood cells: facts and enigmas. *Endeavour* 13, 72–7.
- 618 doi:10.1016/0160-9327(89)90005-7
- 619 Miquerol, L., Kelly, R.G., 2013. Organogenesis of the vertebrate heart. *Wiley Interdiscip. Rev. Dev. Biol.* 2, 17–29.
- 620 doi:10.1002/wdev.68
- 621 Mukai, H., Saito, Y., Watanabe, H., 1987. Viviparous development in Botrylloides (compound ascidians). *J.*
- 622 *Morphol.* 193, 263–276. doi:10.1002/jmor.1051930305
- 623 Mukai, H., Sugimoto, K., Taneda, Y., 1978. Comparative studies on the circulatory system of the compound
- 624 ascidians, Botryllus, Botrylloides and Symplegma. *J. Morphol.* 157, 49–78. doi:10.1002/jmor.1051570105
- 625 Oka, H., Watanabe, H., 1959. Vascular budding in Botrylloides. *Biol. Bull.* 117, 340. doi:10.2307/1538913
- 626 Oka, H., Watanabe, H., 1957. Vascular budding, a new type of budding in Botryllus. *Biol. Bull.* 112, 225.
- 627 doi:10.2307/1539200
- 628 Paul, P., Duessmann, H., Bernas, T., Huber, H., Kalamatianos, D., 2010. Automatic noise quantification for confocal
- 629 fluorescence microscopy images. *Comput. Med. Imaging Graph.* 34, 426–434.
- 630 doi:10.1016/j.compmedimag.2010.04.001
- 631 Rinkevich, B., Shlemberg, Z., Fishelson, L., 1995. Whole-body protochordate regeneration from totipotent blood
- 632 cells. *Proc. Natl. Acad. Sci. U. S. A.* 92, 7695–9.
- 633 Rinkevich, Y., Paz, G., Rinkevich, B., Reshef, R., 2007. Systemic bud induction and retinoic acid signaling underlie
- 634 whole body regeneration in the urochordate *Botrylloides leachi*. *PLoS Biol.* 5, e71.
- 635 doi:10.1371/journal.pbio.0050071
- 636 Rinkevich, Y., Rinkevich, B., Reshef, R., 2008. Cell signaling and transcription factor genes expressed during
- 637 whole body regeneration in a colonial chordate. *BMC Dev. Biol.* 8, 100. doi:10.1186/1471-213X-8-100
- 638 Rinkevich, Y., Rosner, A., Rabinowitz, C., Lapidot, Z., Moiseeva, E., Rinkevich, B., 2010. *Piwi* positive cells that line
- 639 the vasculature epithelium, underlie whole body regeneration in a basal chordate. *Dev. Biol.* 345, 94–104.
- 640 doi:10.1016/j.ydbio.2010.05.500
- 641 Sabbadin, A., 1969. The compound ascidian *Botryllus schlosseri* in the field and in the laboratory. *Pubbl. Staz. Zool.*
- 642 *Napoli* 37, 62–72.
- 643 Sánchez Alvarado, A., Tsonis, P.A., 2006. Bridging the regeneration gap: genetic insights from diverse animal
- 644 models. *Nat. Rev. Genet.* 7, 873–884. doi:10.1038/nrg1923
- 645 Savigny, J.-C., 1816. Mémoires sur les animaux sans vertèbres. Dufour, G., Paris. doi:10.5962/bhl.title.9154
- 646 Seifert, A.W., Kiama, S.G., Seifert, M.G., Goheen, J.R., Palmer, T.M., Maden, M., 2012. Skin shedding and tissue
- 647 regeneration in African spiny mice (*Acomys*). *Nature* 489, 561–5. doi:10.1038/nature11499
- 648 Tanaka, E.M., Reddien, P.W., 2011. The cellular basis for animal regeneration. *Dev. Cell* 21, 172–185.
- 649 doi:10.1016/j.devcel.2011.06.016
- 650 Voskoboinik, A., Simon-Blecher, N., Soen, Y., Rinkevich, B., De Tomaso, A.W., Ishizuka, K.J., Weissman, I.L., 2007.
- 651 Striving for normality: whole body regeneration through a series of abnormal generations. *FASEB J.* 21,
- 652 1335–44. doi:10.1096/fj.06-7337com
- 653 Voskoboinik, A., Soen, Y., Rinkevich, Y., Rosner, A., Ueno, H., Reshef, R., Ishizuka, K.J., Palmeri, K.J., Moiseeva, E.,
- 654 Rinkevich, B., Weissman, I.L., 2008. Identification of the endostyle as a stem cell niche in a colonial chordate.
- 655 *Cell Stem Cell* 3, 456–64. doi:10.1016/j.stem.2008.07.023
- 656 Wright, R.K., 1981. Urochordates, in: Ratcliffe, N.A., Rowley, A.F. (Eds.), *Invertebrate Blood Cells. Volume 2.*
- 657 *Arthropods to Urochordates, Invertebrates and Vertebrates Compared.* Academic Press, London, pp. 565–
- 658 626.
- 659 Wright, R.K., Ermak, T.H., 1982. Cellular defense systems of the protochordata, in: *Phylogeny and Ontogeny.*
- 660 Springer US, Boston, MA, pp. 283–320. doi:10.1007/978-1-4684-4166-6\_8
- 661 Zaniolo, G., Sabbadin, A., Resola, C., 1976. Dynamics of the colonial cycle in the ascidian, *Botryllus schlosseri*. The
- 662 fate of isolated buds. *Acta Embryol. Exp.* 205–213.
- 663 Zondag, L.E., Rutherford, K., Gemmell, N.J., Wilson, M.J., 2016. Uncovering the pathways underlying whole body
- 664 regeneration in a chordate model, *Botrylloides leachi* using de novo transcriptome analysis. *BMC Genomics*
- 665 17, 114. doi:10.1186/s12864-016-2435-6
- 666
- 667

668 **Figure legends**

669

670

671 **Fig. 1 *Botrylloides leachii* schematic morphology and physiology.** Abbreviations: zooid (z),  
672 system (y), tunic (c), vascular system (v), terminal ampullae (a), buccal siphon (p<sub>b</sub>), atrial  
673 siphon (p<sub>a</sub>), oral tentacles (t), endostyle (e), pharyngeal basket (k), stigmata (g), neural  
674 ganglion (n), heart (h), stomach (s), bud (b), dorsal sinus (u<sub>d</sub>), ventral sinus (u<sub>v</sub>). **(A)** Top-view  
675 of a stereotypical colony composed of 72 zooids. Dashed-delimited area magnified in **B**. **(B)**  
676 Top-view of a single zooid. Longitudinal plane (dashed) depicted in **C**. **(C)** Left lateral view of a  
677 zooid. Abvisceral/advisceral haemolymph direction and contraction/dilatation of ampullae  
678 are depicted using red/purple arrows, respectively. Dashed-delimited areas are exemplified  
679 in **D-F**. *In vivo* stereo-microscopic images of a large vessel (**D**), vascular junction (**E**) and  
680 terminal ampullae (**F**), taken from recordings showcased in Movie S1. **(G)** *B. leachii* WBR from  
681 a fragment of vascular tissue through our five defined stages and the approximate time-line

682

683

684 **Fig. 2 Quantification of the haemolymph circulation in *B. leachii*.** **(A)** Average (n=8)  
685 abvisceral haemolymph flow based on PIV measurement of time-lapse large vessel recordings.  
686 Depicted are the individual recordings (thin grey lines), the recording utilized for Fig. S1  
687 (thick grey line), the average velocity (red line) and standard deviation (light grey area). A  
688 visual representation of the duration of abvisceral and advisceral phase durations is shown  
689 (blue). **(B)** Dilatation-contraction cycles of eight terminal ampullae (Fig. S2) from a single  
690 time-lapse recording. The raw data (darker line) is overlaid with a smoothed measurement  
691 (lighter line), local maxima and local minima (down and up triangles, respectively). The  
692 abvisceral phase of the haemolymph flow corresponds to the contraction phase of the

693 ampullae. **(C)** Ampullae contractions are independent from heart activity and can drive  
694 haemolymph flow (green arrows) by synchronized spatially restricted contractions (red  
695 arrows) and dilatations (purple arrows)

696

697

698 **Fig. 3 Characterization of *B. leachii* haemocytes.** Stereotypical schemas along with  
699 characteristic images of all haemocytes identified in *B. leachii* stained with Giemsa dye, both  
700 from haemolymph smears and whole-colony histological sections. The illustrated cell is either  
701 located at the centre of the image or indicated by an arrowhead. Note that the cells in the  
702 histological sectioning show a degree of shrinkage following PFA fixation

703

704

705 **Fig. 4 Histology of palleal budding.** Abbreviations: zooid (z), first-generation bud ( $z_0$ ),  
706 second-generation bud (b), bud disc ( $b_d$ ), oocyte (o), endostyle (e), pharyngeal basket (k),  
707 stigmata (g), intestine (i), stomach (s). All sections are stained with H&E. **(A)** Typical *B. leachii*  
708 asexual reproduction cycle with three generations co-existing: mature zooid (dark grey), two  
709 first-generation buds (light grey) and two budlets visible. **(B)** Bud developing two bud discs  
710 and oocytes. **(C)** First-generation bud with right budlet protruding and left budlet fully  
711 circular. **(D)** Young bud starting to invaginate. **(E)** Older bud with pharyngeal basket, tentative  
712 stigmata, a bud disc and oocytes. Arrowhead points at the interstitial space surrounding the  
713 bud. **(F)** Bud on the point of becoming a filter-feeding zooid

714

715

716 **Fig. 5 Progression of *B. leachii* WBR.** Abbreviation: haemolymph clot ( $v_c$ ), collagen ( $c_n$ ),  
717 spheroid bud ( $z_s$ ), first-generation bud ( $z_0$ ), intestine (i). **(A)** Stage 0: Giemsa stain of injured

718 vascular tissue displaying signs of tunic contraction (arrowheads) and clotting. **(B)** Stage 1:  
719 Collagen remodelling and infiltration of cells into the tunic (arrowheads). Methyl blue within  
720 MSB dyes collagen blue. **(C)** Stage 2: H&E stained giant cells (arrowheads) throughout the  
721 remodelling vasculature. **(D)** Stage 3: Giemsa stained regeneration niches at different stages  
722 of development, and increase in macrophage-like cells (see **A** and **F**). **(E)** Stage 4: H&E stain  
723 shows competing regeneration niches at the first-generation and spheroid stages. **(F)** Stage 5:  
724 Giemsa stain of a fully regenerated zooid with first-generation bud. **(G)** Evolution of  
725 haemocyte types within ampullae throughout WBR, overlaid with the corresponding standard  
726 error (dotted lines) and stages of WBR (see Fig. 1G). Cell types are indicated in the legend. The  
727 color-coded asterisks show statistical significance between the corresponding populations  
728 (Student's two-tailed *t*-test, \*:  $P < 0.05$ , \*\*:  $P < 0.01$ , \*\*\*:  $P < 0.001$ )

729

## 730 **Electronic supplementary material**

731

## 732 **Supplementary figure legends**

733

734

735 **Fig. S1 Quantification of haemolymph flow.** **(A)** Raw image overlaying the spatial margin  
736 (black) used during the analysis. **(B)** Difference between **A** and its successor frame showing  
737 moving haemocytes (white/red) and the added margin (magenta). **(C)** Detection of moving  
738 cells thresholded from **B**. **(D)** Average detection of haemolymph movement inside vessels. **(E)**  
739 Location of the main vessels thresholded from **D**. **(F)** Identified straight segments of vessels  
740 (purple). **(G)** Difference frame used for tracking haemolymph flow. Start (blue) and end (red)  
741 of objects' trajectories are visible. Dashed-delimited area magnified in **I**. **(H)** Difference frame  
742 following that depicted in **G**. **(I)** Area magnified from **G**. **(J)** PIV quantification (green) of

743 haemolymph flow inferred using frames **G** and **H**. Dashed-delimited area magnified in **K**. (**K**)  
744 Areas magnified from **J**. (**L**) 2D density histogram overlaying PIV measurements (dots),  
745 inferred flow velocity (orange), smoothed velocity (brown) and the position of the frames  
746 displayed in **A-K** (blue)

747

748

749 **Fig. S2 Quantification of ampullar contractions.** (**A**) Raw frame from the time-lapse  
750 recording analysed in Fig. 2B. (**B**) Intensity-based thresholding of **A** used for the detection of  
751 ampullae. (**C**) Detection of the ampullae in **A**, color-coded in shades of purple and overlaid  
752 with centred circles of corresponding area. (**D**) Clustering of ampullar detections, color-coded  
753 in shades of purple. Each circle depicts ampullar detection in some frame of the entire  
754 recording. Coloured circles represent detections clustered together, black circles represent  
755 spurious detections that were filtered out

756

757

758 **Fig. S3 Ampullar contraction induces haemolymph flow.** (**A**) Raw frame from the time-  
759 lapse recording Movie S5. (**B**) Average difference between consecutive frames of the  
760 recording. The blue-white-red colour-code depicts contraction in blue and dilatation in red.  
761 (**C**) Average absolute second order difference between frames depicting haemolymph flow

762

763

764 **Fig. S4 Vascular lining detaching from the tunic in an adult colony.** High magnification of  
765 a Giemsa stained histological section of a terminal ampulla in an adult colony. Arrows point a  
766 portion of the vascular lining detaching from the surrounding tunic

767

768 **Movie legends**

769

770 **Movie S1** Showcasing the various aspects of haemolymph flow in the vascular system of *B.*  
771 *leachii* vascular system using brightfield microscopy. Three different movies (from a large  
772 vessel, at a vascular junction and terminal ampullae, respectively) were combined to produce  
773 this presentation. The time and scale are specified on the frames of the recording in the top-  
774 left and bottom-right corners of the image, respectively. MPEG-4 recording file encoded with  
775 the H.264 codec

776

777 **Movie S2** Haemolymph flow analysed in Fig. S1. MPEG-4 recording file encoded with the  
778 H.264 codec

779

780 **Movie S3** The turbulences of haemolymph flow at junctions during flow reversal. The upper  
781 panel depicts the measured haemolymph velocity in the various vessel segments, while the  
782 lower panel overlays the original recording with the detected vessel segments (blue) and  
783 haemolymph flow (red arrows). MPEG-4 recording file encoded with the H.264 codec

784

785 **Movie S4** Time-lapse recording of injury-induced WBR. MPEG-4 recording file encoded with  
786 the H.264 codec

787

788 **Movie S5** Time-lapse recording of WBR, 6 days post injury. The recorded tissue is the one  
789 visible in Movie S4. MPEG-4 recording file encoded with the H.264 codec

790

791

792 **Table 1.** Summary of cell types present in the *Botrylloides leachii* circulatory system.

| <b>Cell type</b>                      | <b>Subtype</b>               | <b>Circulatory cells</b>                                                   | <b>Older terminology</b>                                                                                               |
|---------------------------------------|------------------------------|----------------------------------------------------------------------------|------------------------------------------------------------------------------------------------------------------------|
| Undifferentiated cell <sup>c, d</sup> | Haemoblast <sup>e, f</sup>   | Haemoblast <sup>e, f</sup><br>Differentiating cell                         | Lymphocyte <sup>a, b</sup><br>Stem cell <sup>d</sup>                                                                   |
| Immunocyte <sup>c</sup>               | Phagocyte <sup>e</sup>       | Hyaline amoebocyte <sup>d, f</sup><br>Macrophage-like cell <sup>d, f</sup> | Amoebocytes with vacuole<br>Signet ring cell <sup>a, b</sup><br>Vacuolated cell <sup>c</sup><br>Leukocyte <sup>c</sup> |
|                                       | Cytotoxic cell <sup>f</sup>  | Granular amoebocyte <sup>b, d, f</sup><br>Morula cell <sup>b, d, e</sup>   | Cells with acidic vacuole <sup>a</sup><br>Green cell <sup>b</sup><br>Leukocyte <sup>c</sup><br>Vanadocyte <sup>a</sup> |
| Transport cell <sup>e</sup>           | Granulocyte <sup>e</sup>     | Compartment amoebocyte <sup>d</sup><br>Compartment cell <sup>a, b, d</sup> | Vacuolated cell <sup>c</sup>                                                                                           |
| Mast cell-like cell <sup>d</sup>      | Granular cell <sup>d</sup>   | Granular cell <sup>d</sup>                                                 | (Unique to <i>B. leachii</i> , <sup>d</sup> )                                                                          |
| Storage cell <sup>f</sup>             | Vacuolated cell <sup>f</sup> | Pigment cell <sup>a, c, d, e</sup>                                         | Cell with reflecting disks <sup>a</sup>                                                                                |
|                                       |                              | Nephrocyte <sup>c, d, e</sup>                                              | Orange cell <sup>b</sup>                                                                                               |

793

794 <sup>a</sup> (Endean, 1960); <sup>b</sup> (Freeman, 1964); <sup>c</sup> (Wright & Ermak, 1982); <sup>d</sup> (Cima et al., 2002); <sup>e</sup> (Hirose

795 et al., 2003); <sup>f</sup> (Ballarin et al., 2011)

796

797



798 **Table 2.** Classification chart of *Botrylloids leachii* haemocytes based on light microscopy  
 799 Giemsa stain. Only the most common traits are listed in this table, refer to Table S1 for full  
 800 description of the cell types.  
 801

| Cell type              | Size (µm) | Shape                                                                             | Stain                                                                                              | Characteristic                                                        |
|------------------------|-----------|-----------------------------------------------------------------------------------|----------------------------------------------------------------------------------------------------|-----------------------------------------------------------------------|
| Haemoblast             | 5 - 8     | Round                                                                             | Blue cytoplasm with a dark-blue nucleus                                                            | High nucleus to cytoplasm ratio                                       |
| Differentiating cell   | 8 - 12    | Swollen, irregular                                                                | Light-blue nucleus and grey cytoplasm                                                              | Fibrous cytoplasm with a proportionally large nucleus                 |
| Hyaline amoebocyte     | 6 - 9     | Amoebocyte: highly irregular, including a variety of pseudopodia                  | Dual purple-blue cytoplasm                                                                         | Purple stained clear cytoplasmic vesicles                             |
| Macrophage-like cell   | 6 - 20    | Mostly round with irregular content                                               | Blue with vesicles of varying shades of yellow, brown, green and grey                              | Vesicles highly heterogeneous in size, shape and content              |
| Granular amoebocyte    | 6 - 10    | Amoebocyte                                                                        | Scattered dark-green cytoplasmic vesicles                                                          | Sparser vesicles than granular cells                                  |
| Morula cell            | 10 - 16   | Circular containing a low number of large (~2 µm), pale yellow and round vacuoles | Orange-green cytoplasmic colour in smears, red colour around the vacuoles in histological sections | Most common cell type in <i>B. leachii</i> haemolymph                 |
| Granular cell          | 8 - 12    | Circular with irregular edge                                                      | Dense dark-blue/green vesicles                                                                     | High density of vesicles renders the cell black and opaque            |
| Compartment amoebocyte | 7 - 10    | Amoebocyte with a berry-like shape                                                | Blue with a dark-blue nucleus                                                                      | Numerous clear protruding vesicles                                    |
| Compartment cell       | 12 - 18   | Similar to morula                                                                 | Unstained-grey opaque vesicles                                                                     | Large uniform vesicles                                                |
| Pigment cell           | 10 - 16   | Similar to morula                                                                 | Filled with minute dark granules, related to the colony colour                                     | The content of the vesicle exhibits Brownian movement in living cells |
| Nephrocyte             | 10 - 16   | Berry-like                                                                        | Dark and speckled grey vesicles                                                                    | An aggregate of dark grey vesicles                                    |

802  
 803

804 **Table S1:** Detailed description of haemolymph cell types present in the *B. leachii* vascular

| <b>Cell type (% of all haemocytes)</b> | <b>Description</b> |
|----------------------------------------|--------------------|
|----------------------------------------|--------------------|

805 system based on histological observations.

---

### **Undifferentiated cells**

---

#### *Haemoblast*

This small (5-8  $\mu\text{m}$ ), almost perfectly round, progenitor cell has a high nuclear-cytoplasmic ratio. It has a consistent dark blue nuclear stain, and most commonly a blue cytoplasmic stain. However, unstained or pink cytoplasmic staining was occasionally observed.

#### *Differentiating cell* (11 %)

A number of transitory cells can be identified in *B. leachii* haemolymph. Although it is difficult to determine which differentiation program these cells are following, the morphology of the majority of cells suggests that they originate from haemoblasts. These medium sized (8-12  $\mu\text{m}$ ) cells display a large light-blue stained nucleus, sometimes a nucleolus, and an unstained, often fibrous, grey cytoplasm with various morphological and staining features reminiscent of their future cell type.

---

### **Immunocytes**

---

#### *Hyaline amoebocyte* (3 %)

As with all other amoebocytes, this small (6-9  $\mu\text{m}$ ) cell has an irregular shape, typically displaying a large variety of pseudopodia. Hyaline amoebocytes have a dual purple-blue cytoplasmic staining, where the purple appears to originate from a variety of clear vesicles. In histological sections, both entirely purple cells and purple cells with a blue crescent containing the nucleus were observed.

#### *Macrophage-like cell* (19 %)

This extremely variable cell (6-20  $\mu\text{m}$ ) shows a wide range of sizes and shapes depending on the material it engulfed. Therefore, although most of the cells were fully stained dark-blue, some colour variations (including shades of yellow, brown, green and grey) were observed depending on the ingested material. Empty macrophage-like cells display a red crested cytoplasm (Cima et al., 2002). Particularly in large cells, the nucleus is displaced towards the periphery of the cell by the phagocytic vacuoles. While they can resemble compartment cells, macrophage-like cells have a greater heterogeneity in the size, shape and content of their vesicles.

#### *Granular amoebocyte* (1 %)

A small (6-10  $\mu\text{m}$ ) amoebocyte characterized by a number of scattered dark-green cytoplasmic vesicles. While they resemble granular cells, granular amoebocytes have a much lower density of granules, always displaying some portion of its cytoplasm. The cytoplasm is stained a light-blue/grey, although dark-blue and red have also been occasionally observed.

#### *Morula cell* (49 %)

This typically large (10-16  $\mu\text{m}$ ) cell is mostly characterized in smears by its orange-green cytoplasmic colour, and in histological sections by the red colour of the thin cytoplasm among the large vacuoles. It displays low numbers of large ( $\sim 2$   $\mu\text{m}$ ), pale yellow

---

and round vacuoles, thus resulting in its characteristic berry-like shape.

---

***Mast cell-like cells***

---

*Granular cell (1 %)*

A medium-sized (8-12  $\mu\text{m}$ ) cell, mostly circular, with a very irregular edge owing to the numerous small vesicles it contains. A variety of vesicles have been observed, but the majority are stained dark-blue/green and packed at such a high density that the whole cell appears black and opaque.

---

***Transport cells***

---

*Compartment amoebocyte (5 %)*

A small (7-10  $\mu\text{m}$ ) amoebocyte characterized by numerous clear protruding vesicles, resulting in a berry-like shaped cell when observed unfixed. Its cytoplasm stains blue, with a dark blue nucleus easily visible in sections but harder to find in smears.

---

*Compartment cell (4 %)*

Large (12-18  $\mu\text{m}$ ) cell that displays few (typically less than 12) but large (~3  $\mu\text{m}$ ) opaque vesicles that remain mostly unstained-grey.

---

***Storage cells***

---

*Pigment cell (2 %)*

A medium-sized (10-16  $\mu\text{m}$ ) cell that displays a number of large vacuoles filled with characteristic minute dark granules, whose colour relates to that of the colony (dark orange in this particular example).

---

*Nephrocyte (1 %)*

This medium-sized (10-16  $\mu\text{m}$ ) cell closely resembles pigment cells but lacks any pigment colour. These cells do not exhibit a circular shape filled with vesicles but rather a berry-like shape, as an aggregate of vesicles.

---

806  
807  
808

Figure 1

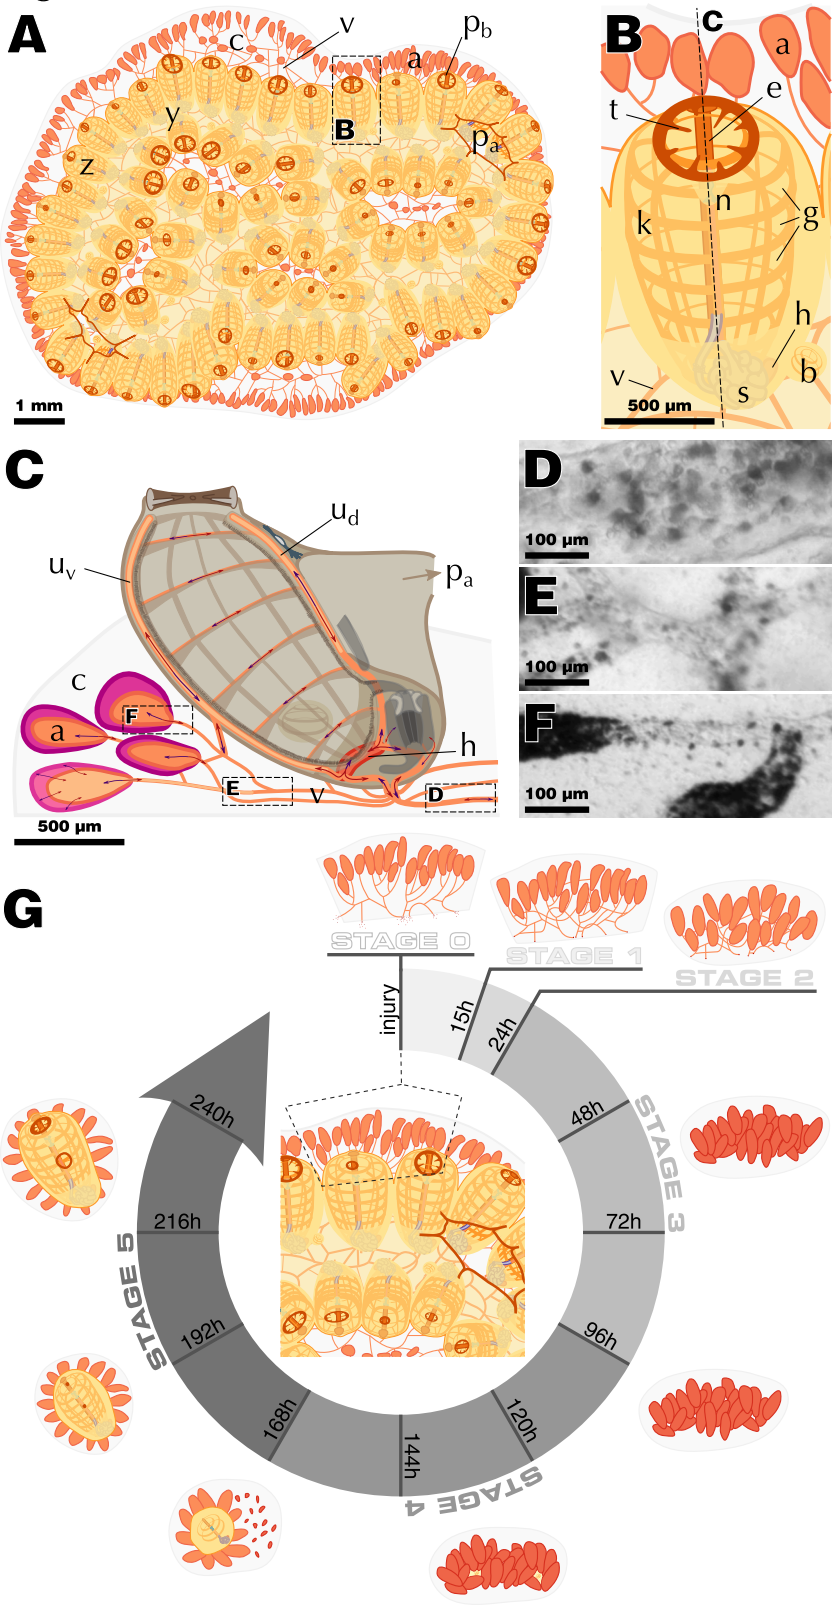

Figure 2

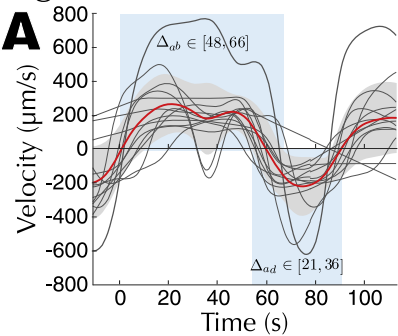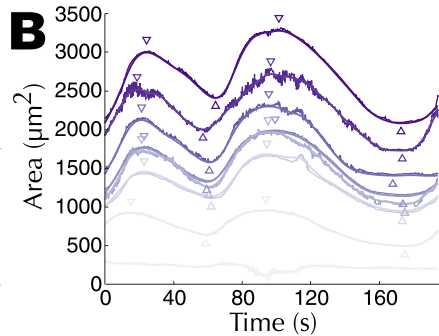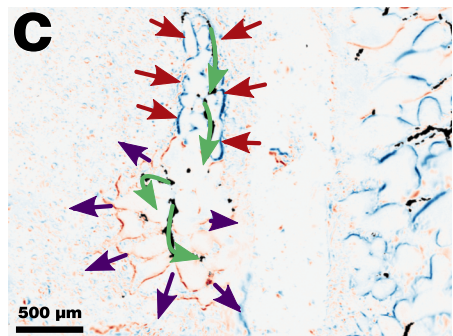

Figure 3

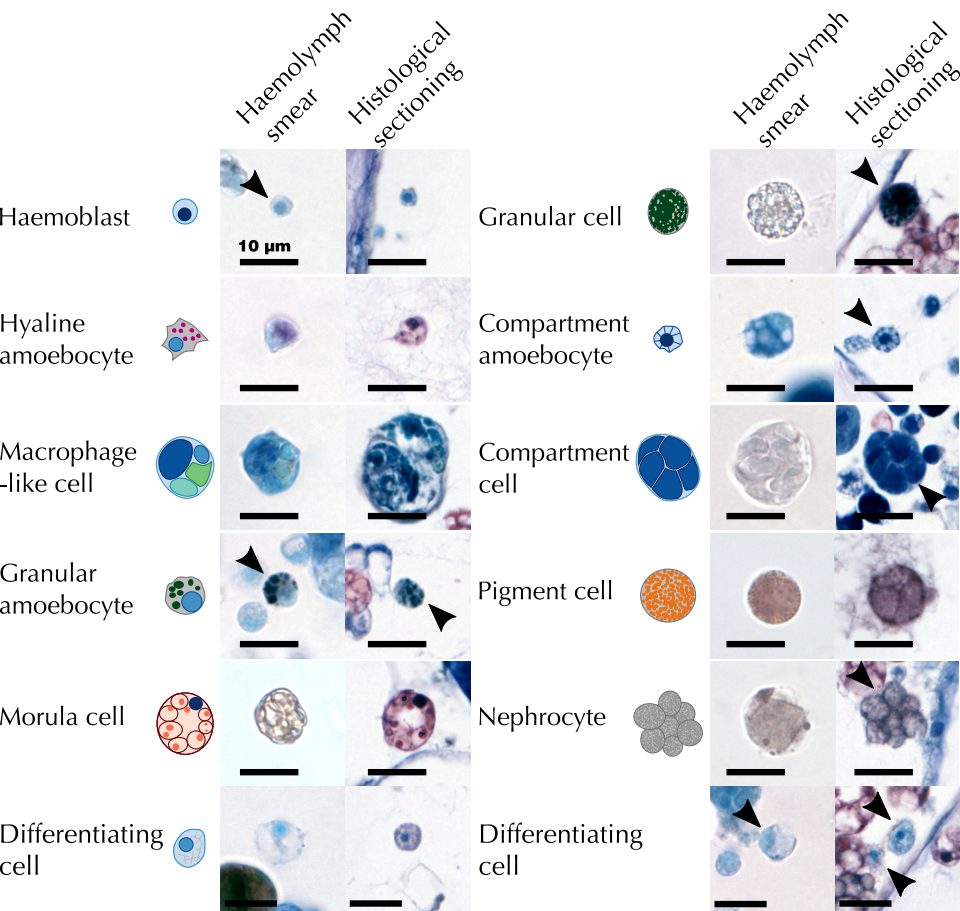

Figure 4

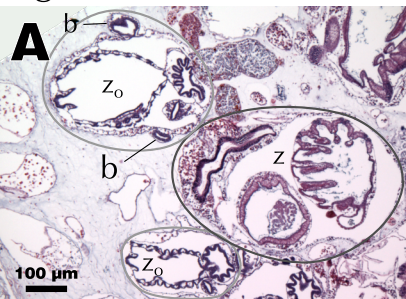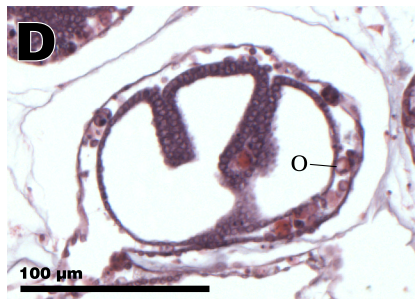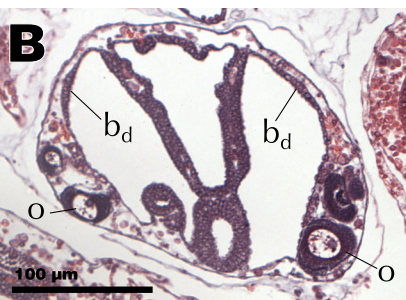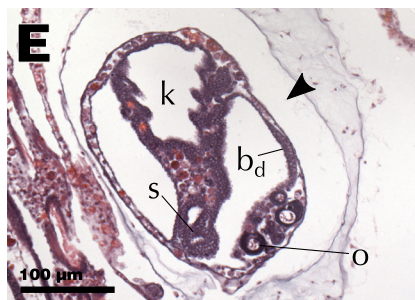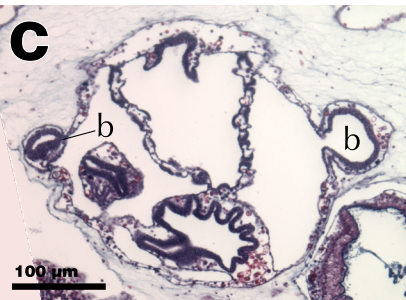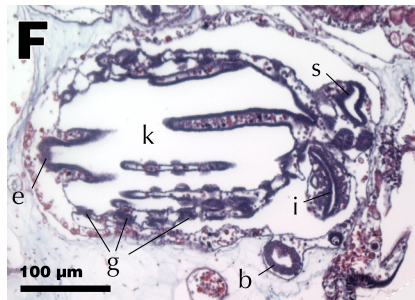



Figure 5

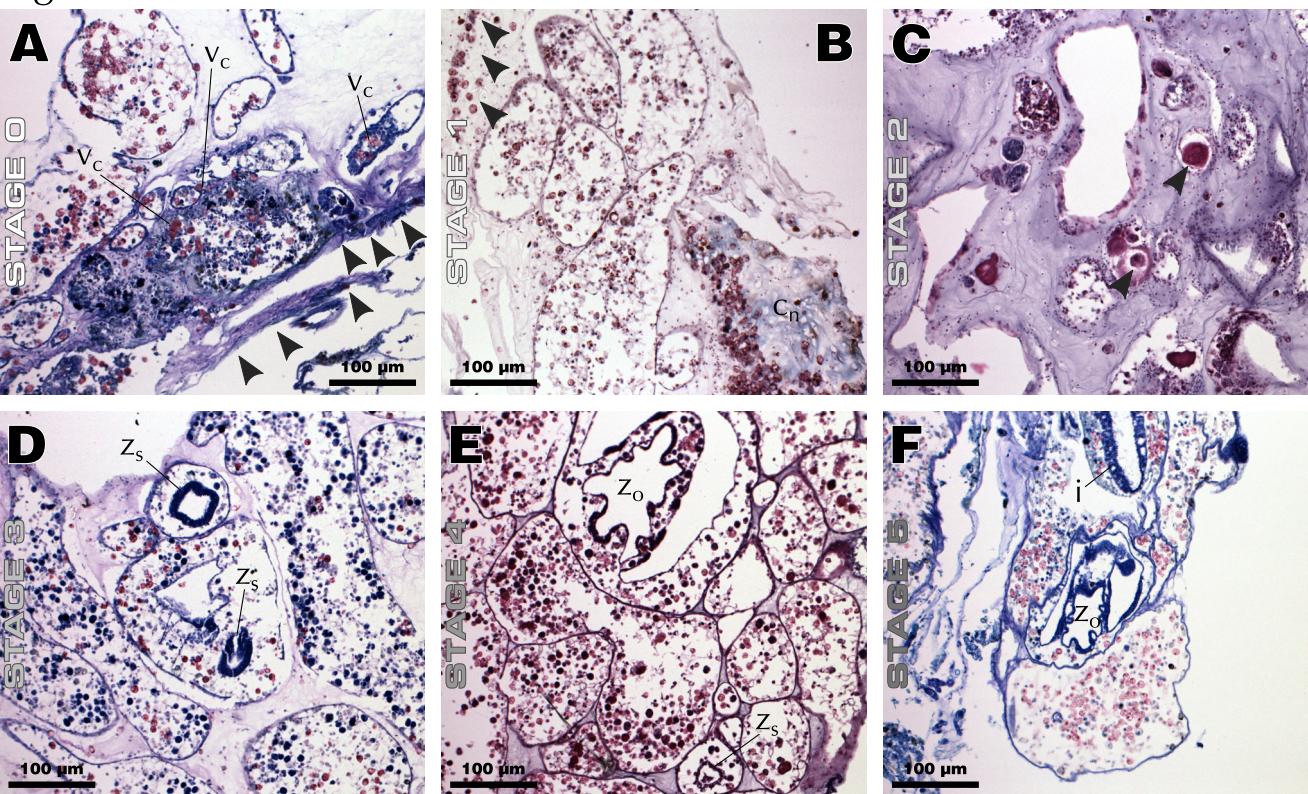

**G**

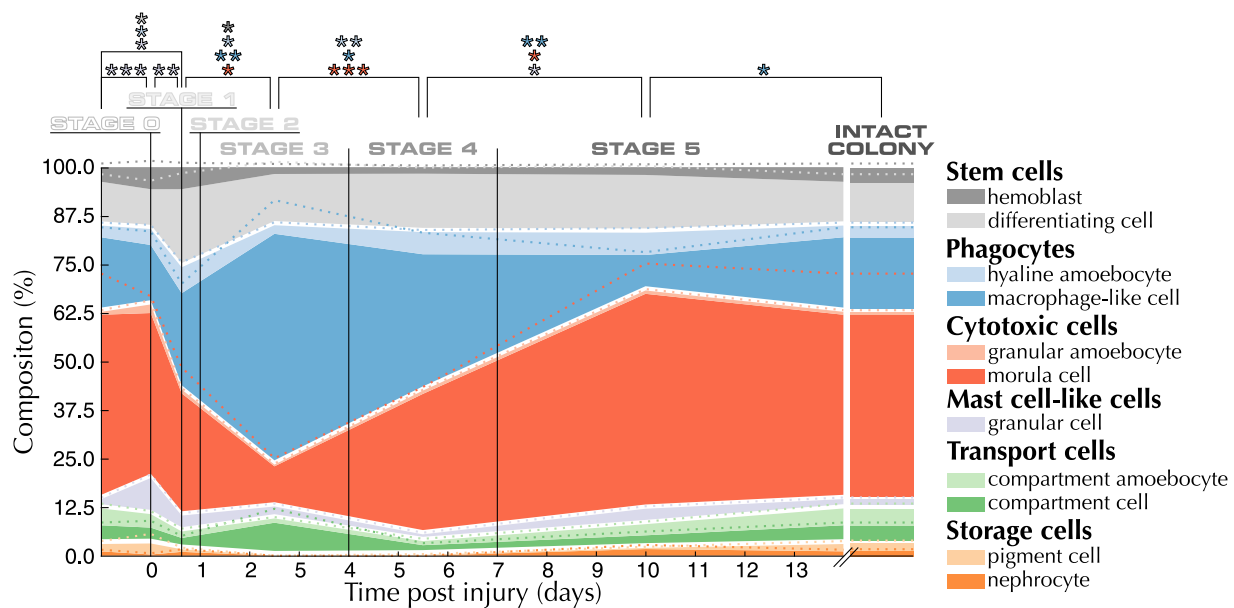

Source: http://biorxiv.org/content/10.1101/099580v1.full.pdf
